# Supplementary material for: Investigating the relationship between BMI across adulthood and late life brain pathologies
Source: Springer Nature journal article supplement (doi:10.1186/s13195-021-00830-7), 2021-04-30
Supplement: MOESM1 [file 19127222]

**Investigating the relationship between BMI across the life course and late life brain pathologies**  
**– Supplementary material**

**eMethods**

**Figure e-1** Flowchart providing an overview of Insight 46 recruitment from the MRC NSHD (modified with permission from James *et al*<sup>1</sup> under the terms of the Creative Commons Attribution 4.0 International License (<http://creativecommons.org/licenses/by/4.0/>)) and summary of imaging data available. BaMoS, Bayesian Model Selection; MRI, magnetic resonance imaging; MCI, mild cognitive impairment; NSHD, National Survey of Health and Development; PET, positron emission tomography; QC, quality control; WMHV, white matter hyperintensity volume.

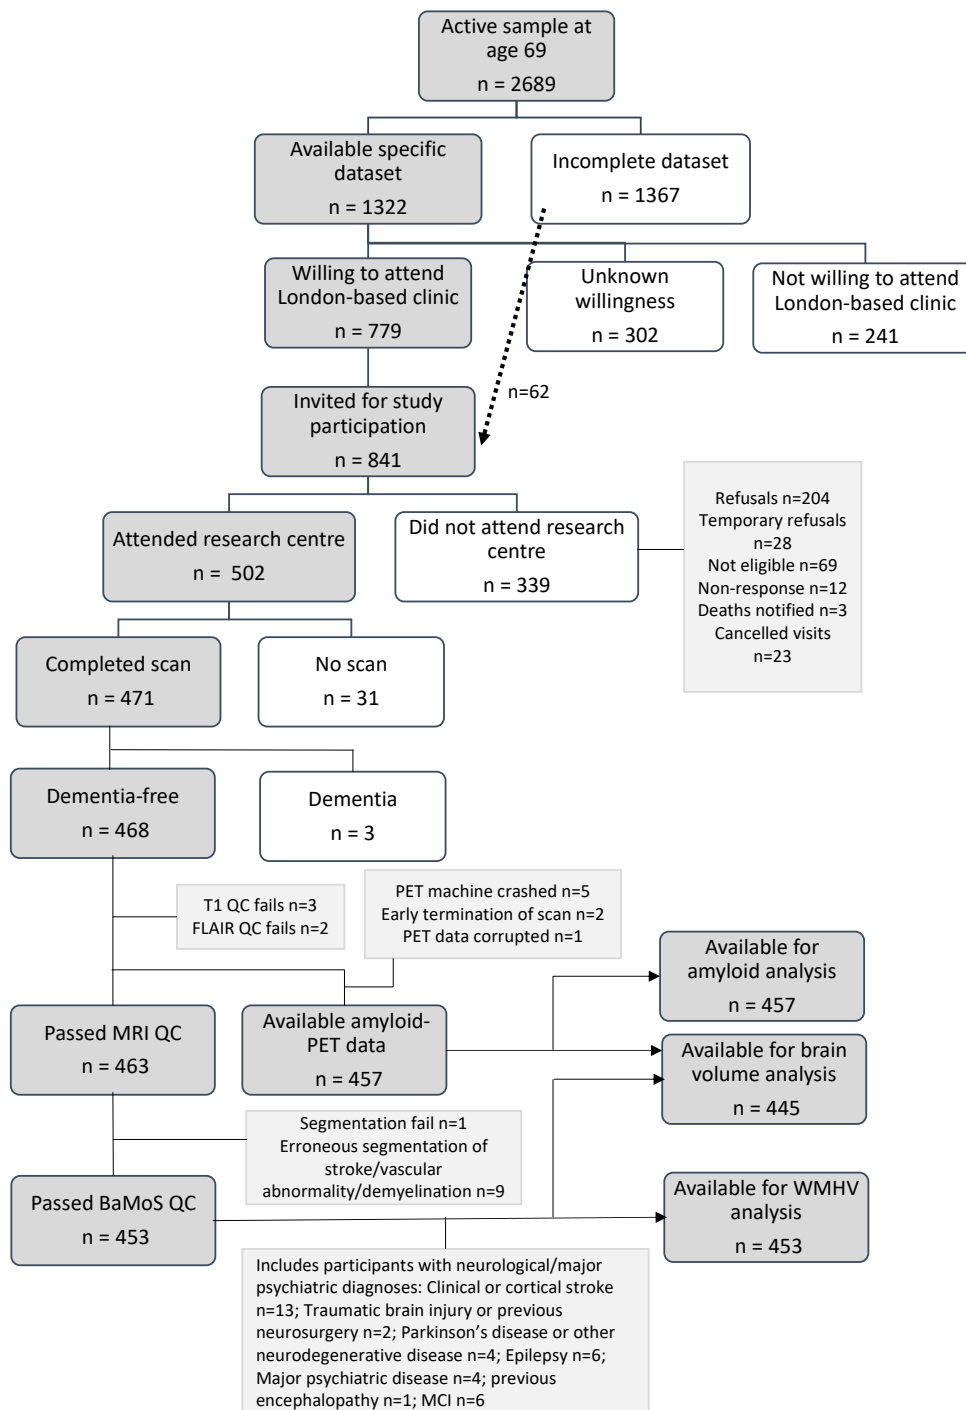

## eResults

**Table e-1 Comparison of clinical characteristics between individuals with missing imaging and BMI data and those who completed scanning and had complete BMI data.** By design, no individuals were missing BMI information at all time-points. 54 individuals were missing a single measurement, 9 individuals were missing a BMI measurement at two time points and 1 individual was missing a measurement at three time points. 2 individuals were missing *APOE-ε4* data. Specific *n* are provided for a given variable. BMI, body mass index; BP, blood pressure; IQR, interquartile range; MMSE, mini-mental state examination; n, number; NA, not applicable; SBP, systolic blood pressure; SD, standard deviation

| Variable                                               | Complete BMI information and completed scanning (n=404) | Missing BMI at any age but completed scanning (n=64) | Did not complete scanning protocol (n=31) |
|--------------------------------------------------------|---------------------------------------------------------|------------------------------------------------------|-------------------------------------------|
| Male:Female                                            | 208:196                                                 | 32:32                                                | 15:16                                     |
| Age at Insight 46 assessment, mean (SD)                | 70.7 (0.7)                                              | 70.8 (0.7)                                           | 70.8 (0.6)                                |
| Amyloid positive, n (%)                                | 71 (18.0)<br>n=394                                      | 12 (19.1)<br>n=63                                    | NA                                        |
| Whole brain volume in ml, mean (SD)                    | 1101.3 (97.9)<br>n=383                                  | 1091.8 (101.7)<br>n=62                               | NA                                        |
| Mean hippocampal volume in ml, mean (SD)               | 3.1 (0.3)<br>n=383                                      | 3.1 (0.4)<br>n=62                                    | NA                                        |
| White matter hyperintensity volume in ml, median (IQR) | 3.3 (1.7, 6.9)<br>n=391                                 | 2.3 (1.0, 5.2)<br>n=62                               | NA                                        |
| Total intracranial volume in ml, mean (SD)             | 1434.9 (132.2)<br>n=391                                 | 1428.2 (133.6)<br>n=62                               | NA                                        |
| MMSE /30, mean (SD)                                    | 29.3 (0.9)                                              | 29.2 (0.9)                                           | 29.4 (1.0)                                |
| BMI at 36 in kg/m <sup>2</sup> , mean (SD)             | 23.7 (3.1)                                              | 23.5 (2.9)<br>n=25                                   | 24.8 (3.6)<br>n=30                        |
| BMI at 43 in kg/m <sup>2</sup> , mean (SD)             | 24.9 (3.2)                                              | 24.8 (3.2)<br>n=44                                   | 26.5 (4.0)                                |
| BMI at 53 in kg/m <sup>2</sup> , mean (SD)             | 27.0 (4.1)                                              | 26.4 (3.8)<br>n=55                                   | 28.1 (4.8)<br>n=30                        |
| BMI at 60-64 in kg/m <sup>2</sup> , mean (SD)          | 27.6 (4.2)                                              | 27.4 (3.9)                                           | 29.6 (5.6)                                |
| BMI at 69 in kg/m <sup>2</sup> , mean (SD)             | 27.6 (4.4)                                              | 27.4 (4.2)<br>n=57                                   | 30.7 (5.5)<br>n=30                        |
| BMI at 71 in kg/m <sup>2</sup> , mean (SD)             | 27.5 (4.4)                                              | 27.7 (4.8)                                           | 30.4 (5.7)                                |
| Smoking Status at age 68, n (%)                        | Current smoker<br>14 (3.5)                              | 2 (3.1)                                              | 2 (6.5)                                   |
|                                                        | Ex-smoker<br>245 (60.6)                                 | 44 (68.8)                                            | 22 (71.0)                                 |
|                                                        | Never smoker<br>145 (35.9)                              | 18 (28.1)                                            | 7 (22.6)                                  |
| Hypercholesterolaemia at age 71, n (%)                 | 319 (79.0)                                              | 52 (81.3)                                            | 27 (87.1)                                 |
| Diabetes mellitus at age 71, n (%)                     | 42 (10.4)                                               | 8 (13.3)<br>n=60                                     | 5 (16.7)<br>n=30                          |
| SBP at age 71 in mmHg, mean (SD)                       | 137.0 (16.5)<br>n=403                                   | 136.9 (19.0)                                         | 138.6 (18.3)                              |
| Adult socioeconomic position, n (%)                    | Non-manual (Class I-III-N)<br>354 (87.6)                | 44 (68.8)                                            | 26 (83.9)                                 |
|                                                        | Manual (Class III-M-V)<br>50 (12.4)                     | 20 (31.3)                                            | 5 (16.1)                                  |
| <i>APOE-ε4</i> carrier (1 or 2 alleles), n (%)         | 120 (29.9)<br>n=402                                     | 19 (29.7)                                            | 7 (22.6)                                  |

## References

1. James SN, Lane CA, Parker TD, et al. Using a birth cohort to study brain health and preclinical dementia: Recruitment and participation rates in Insight 46. *BMC Res Notes*. 2018; 11(1):885
